# Supplementary material for: Synthesis, characterization and anticancer activity of dinuclear ruthenium(ii) complexes linked by an alkyl chain
Source: Royal Society of Chemistry journal article supplement (doi:10.1039/c5nj00582e), 2015-01-01
Supplement: c5nj00582e1.pdf [file c5nj00582e1.pdf]

## Electronic Supplementary Information

### Synthesis, characterization and anticancer activity of dinuclear ruthenium(II) complexes linked by alkyl chain

Yan Zhang <sup>a</sup>, Lu Lai <sup>b</sup>, Ping Cai <sup>a\*</sup>, Gong-Zhen Cheng <sup>a\*</sup>, Yi Liu <sup>a</sup>

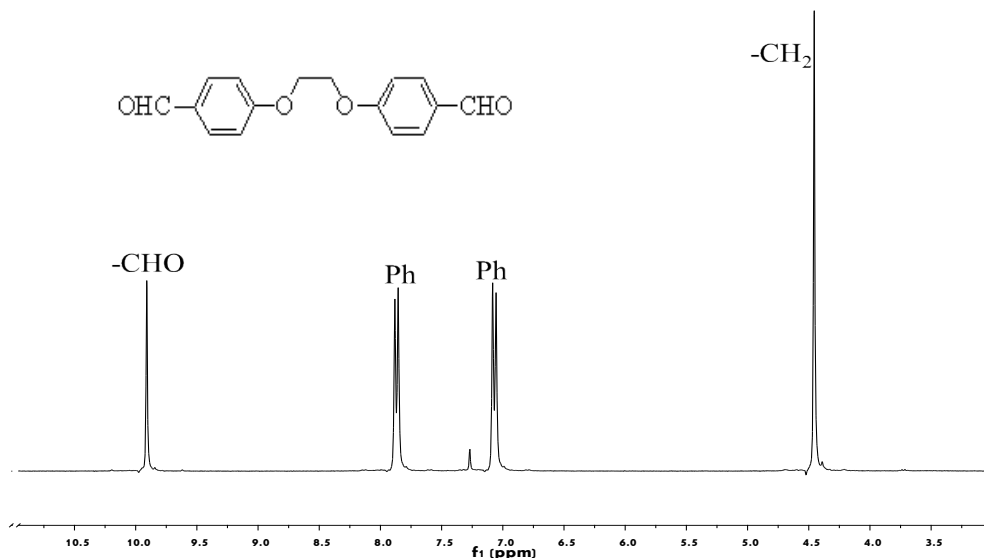

4,4'-(ethane-1,2-diylbis(oxy))dibenzaldehyde

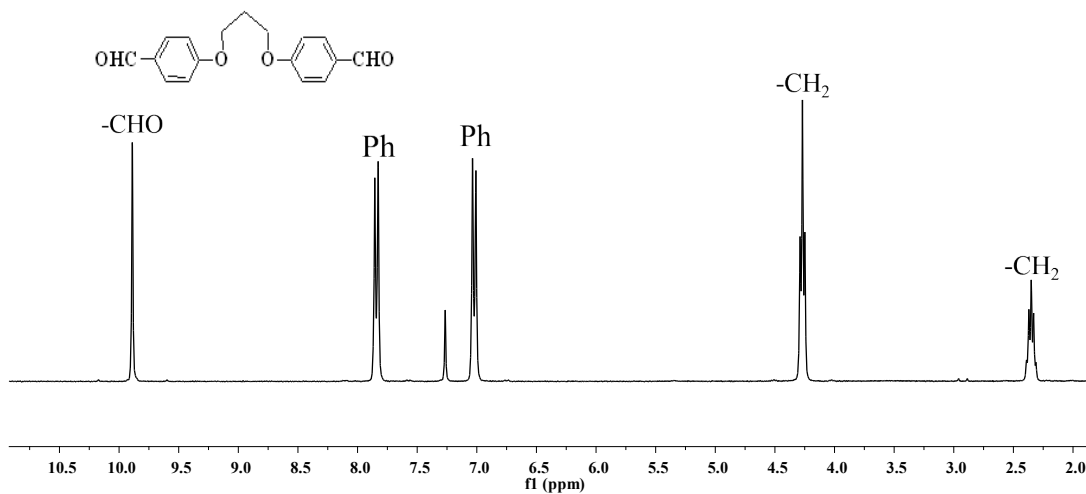

4,4'-(propane-1,3-diylbis(oxy))dibenzaldehyde

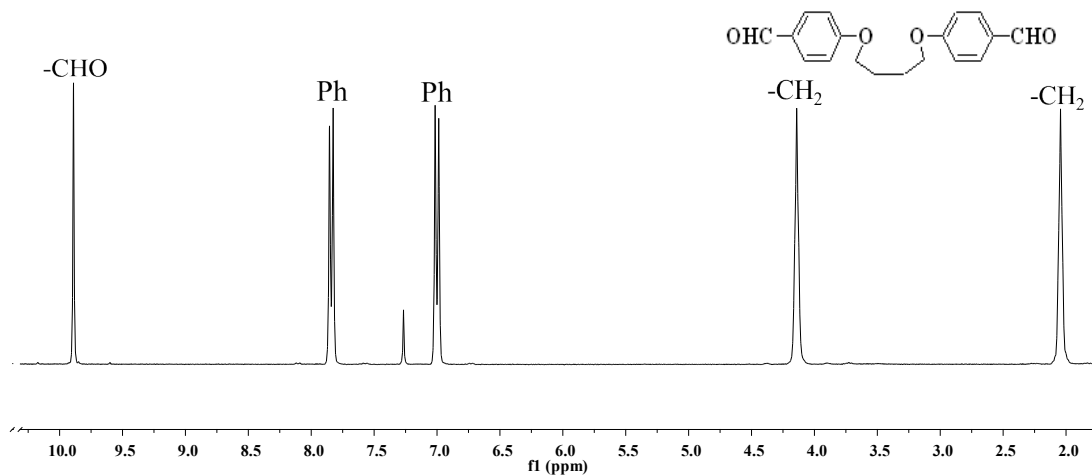

4,4'-(butane-1,4-diylbis(oxy))dibenzaldehyde

Fig.1 <sup>1</sup>H NMR spectrum of dialdehyde in CDCl<sub>3</sub>

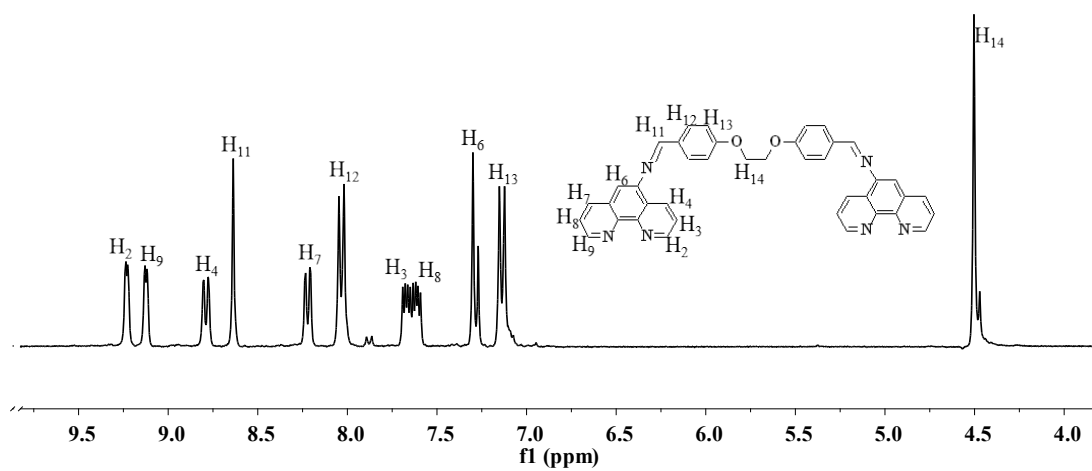

**L<sup>1</sup>**

5

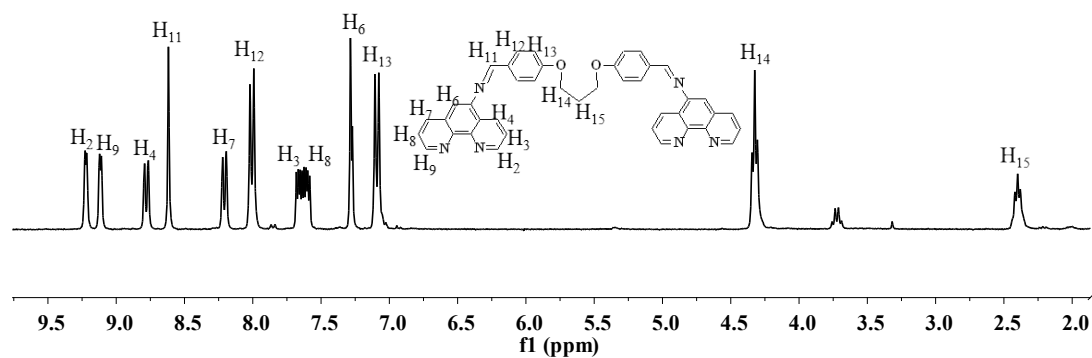

**L<sup>2</sup>**

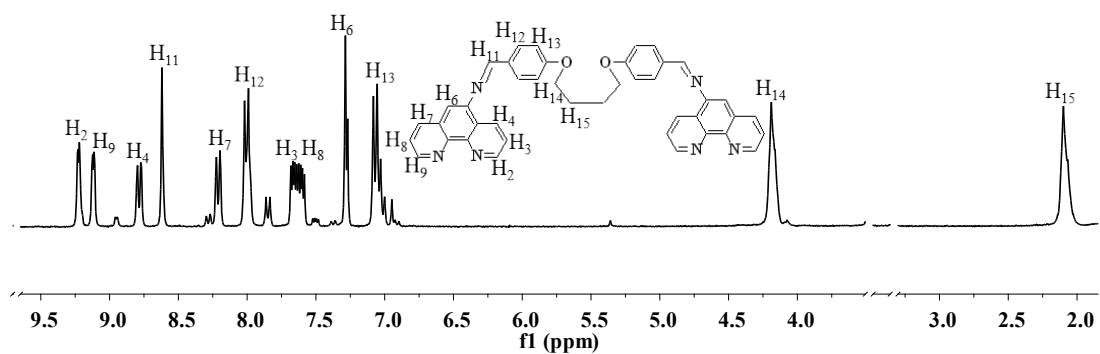

**L<sup>3</sup>**

Fig.2 <sup>1</sup>H NMR spectrum of Schiff base **L<sup>1-3</sup>** in CDCl<sub>3</sub>.

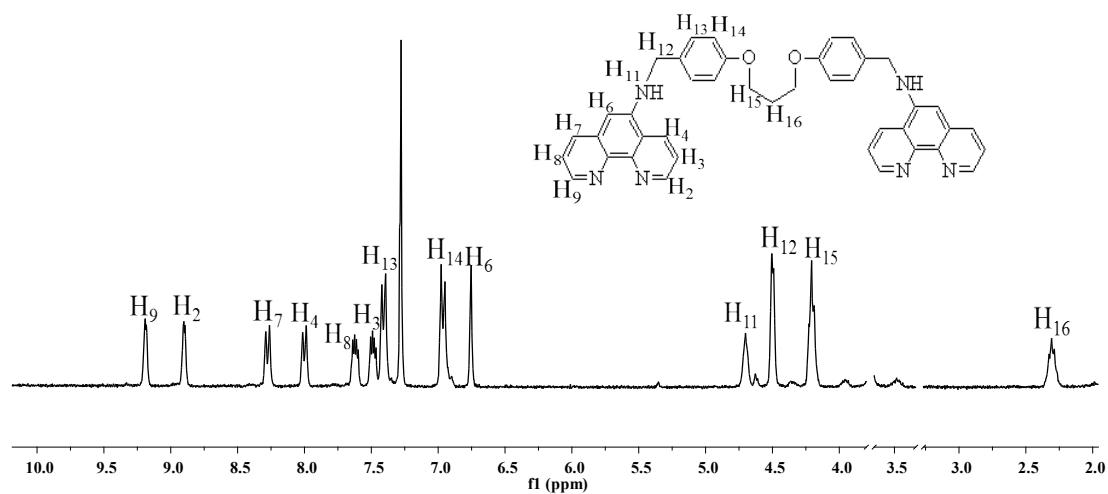

**BL<sup>2</sup>**

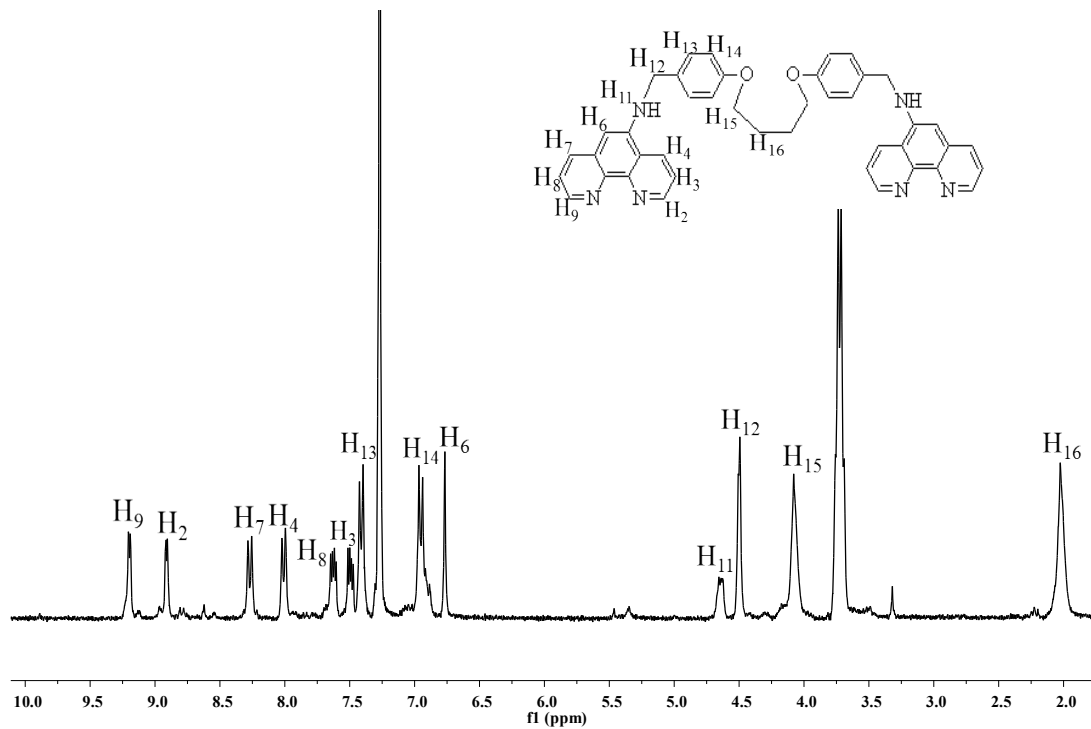

**BL<sup>3</sup>**

Fig.3 <sup>1</sup>H NMR spectrum of BL<sup>2</sup> and BL<sup>3</sup> in CDCl<sub>3</sub>.

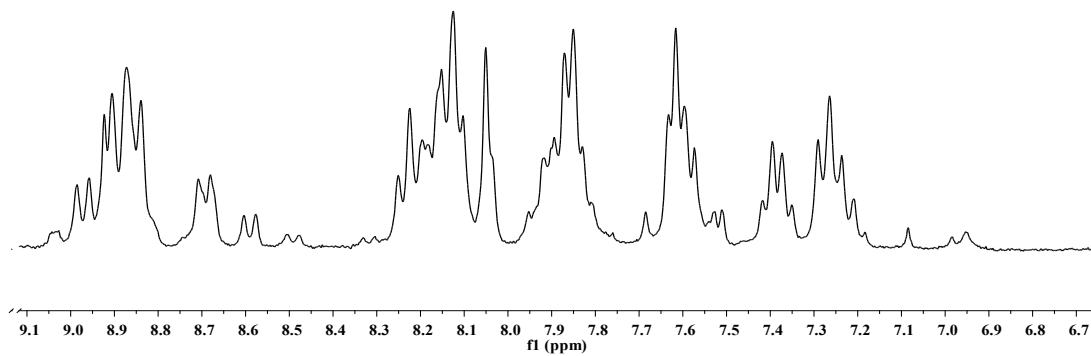

**Complex 1**

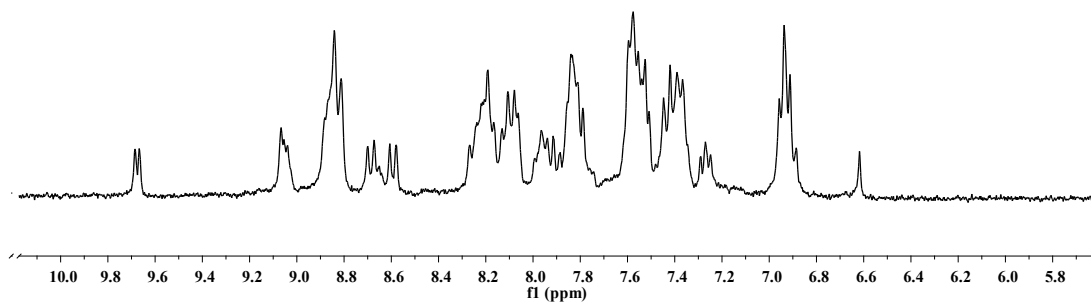

**Complex 2**

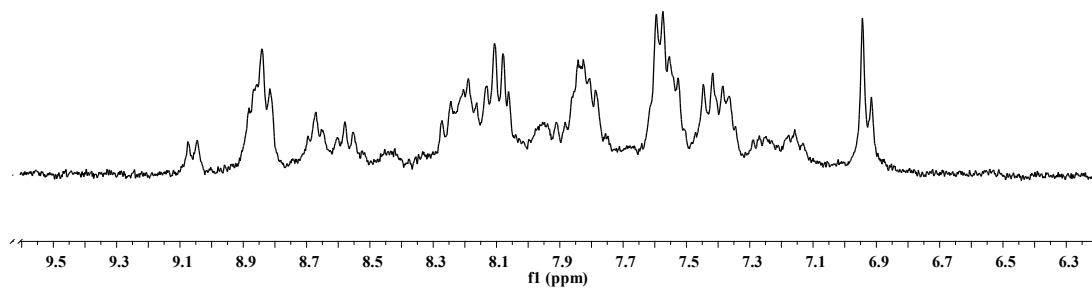

### Complex 3

Fig.4  $^1\text{H}$  NMR spectrum of complexes 1-3 in the aromatic region in  $d_6$ -DMSO

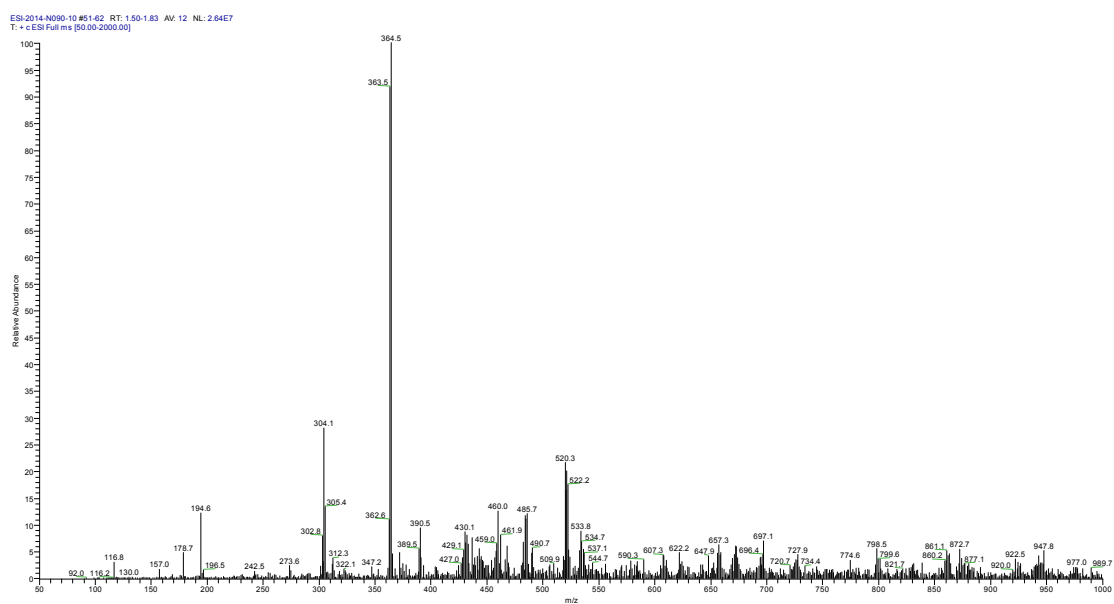

### Complex 1

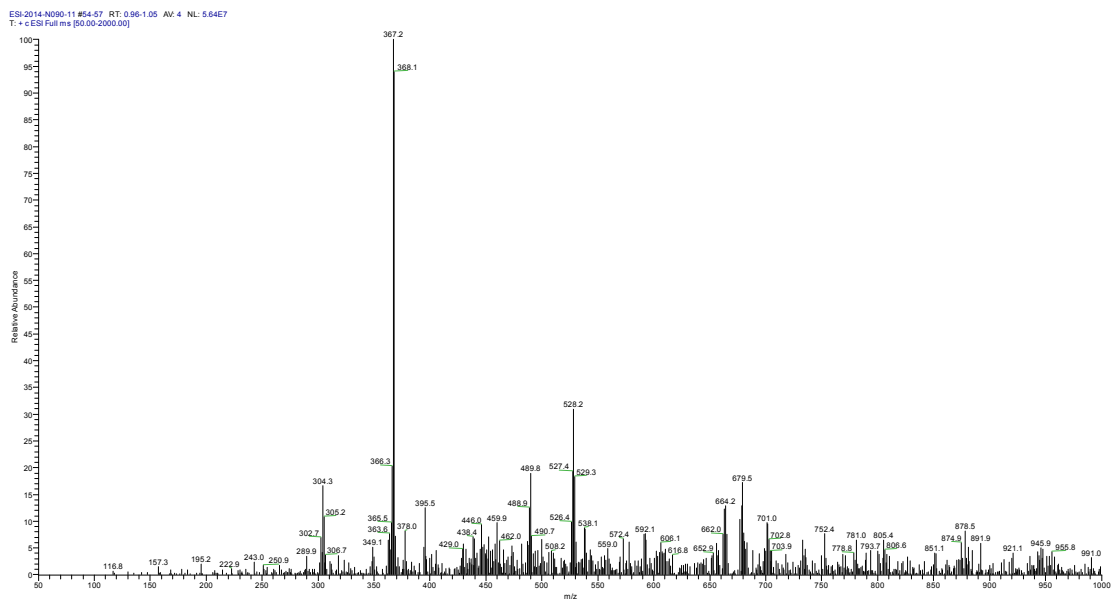

**Complex 2**

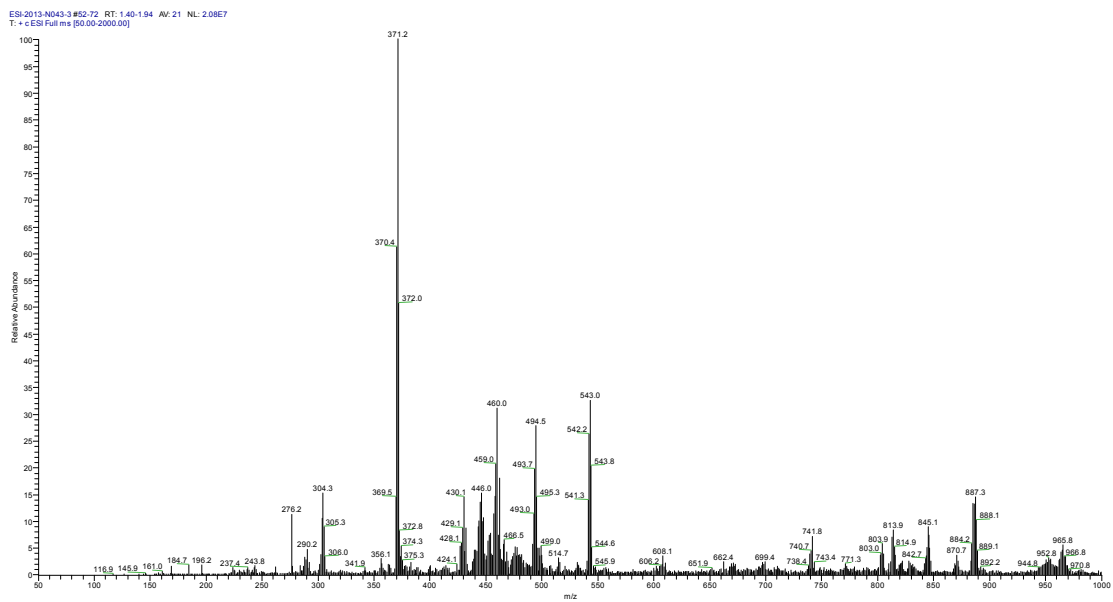

**Complex 3**

Fig. 5 ESI-MS mass spectrum of the complexes **1-3** in DMSO
